# Supplementary material for: Cyrene™, a Sustainable Solution for Graffiti Paint Removal
Source: MDPI journal article supplement (doi:10.3390/suschem4020012), 2023-03-31
Supplement: s1 [file s1]

Supplementary data for:  
Cyrene™, a sustainable solution for graffiti paint removal

Roxana A. Milesu<sup>1</sup>, Thomas J. Farmer<sup>2</sup>, James Sherwood<sup>2</sup>, Con R. McElroy<sup>1,3,\*</sup> and James H. Clark<sup>1,\*</sup>

<sup>1</sup>Circa Renewable Chemistry Institute, Green Chemistry Centre of Excellence, Department of Chemistry, University of York, Heslington, North Yorkshire YO10 5DD, UK; [Roxana.milesu@york.ac.uk](mailto:Roxana.milesu@york.ac.uk) (R.A.M.); [james.clark@york.ac.uk](mailto:james.clark@york.ac.uk) (J.H.C.)

<sup>2</sup>Green Chemistry Centre of Excellence, Department of Chemistry, University of York, Heslington, North Yorkshire YO10 5DD, UK; [thomas.farmer@york.ac.uk](mailto:thomas.farmer@york.ac.uk) (T.J.F.); [james.sherwood@york.ac.uk](mailto:james.sherwood@york.ac.uk) (J.S.)

<sup>3</sup>Joseph Banks Laboratories, School of Chemistry, University of Lincoln, Lincoln, Lincolnshire LN6 7DL, UK; [CMcElroy@lincoln.ac.uk](mailto:CMcElroy@lincoln.ac.uk)

\*Correspondence: [CMcElroy@lincoln.ac.uk](mailto:CMcElroy@lincoln.ac.uk) and [james.clark@york.ac.uk](mailto:james.clark@york.ac.uk)

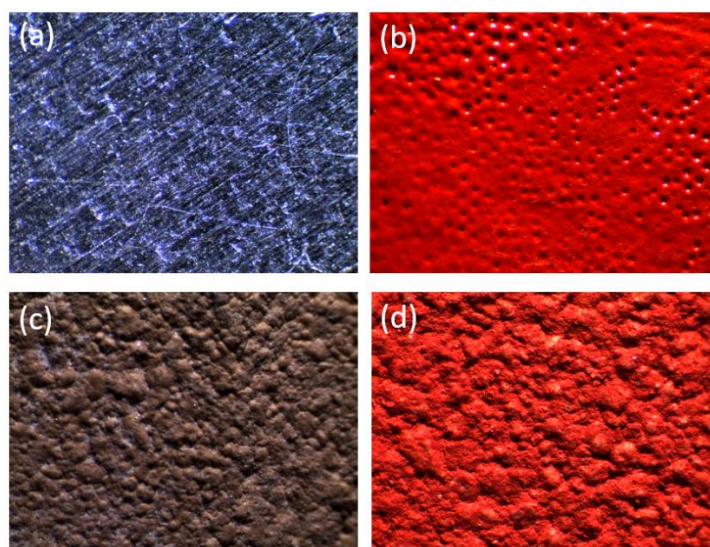

**Figure S1.** Pristine aluminium foil (a) and ceramic tile (c) and painted substrates (b and d).

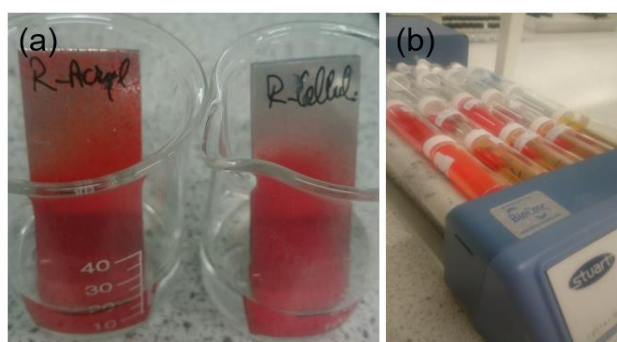

**Figure S2.** Immersion tests by dip-in (a) and immersion using Stuart rollers (b).

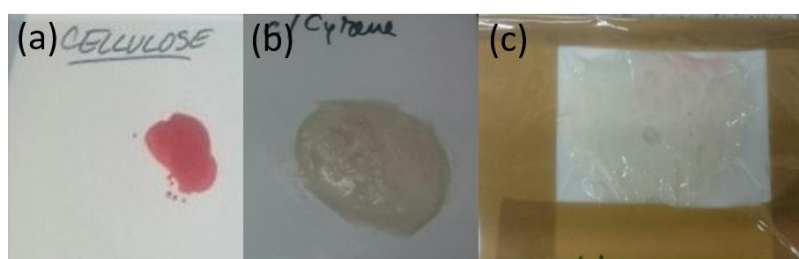

**Figure S3.** Poultice test: (a) the stained surface was covered by (b) poultices made of solvent and talc and covered using plastic foil. After 24 hours, (c) the plastic foil was removed, and results were assessed.

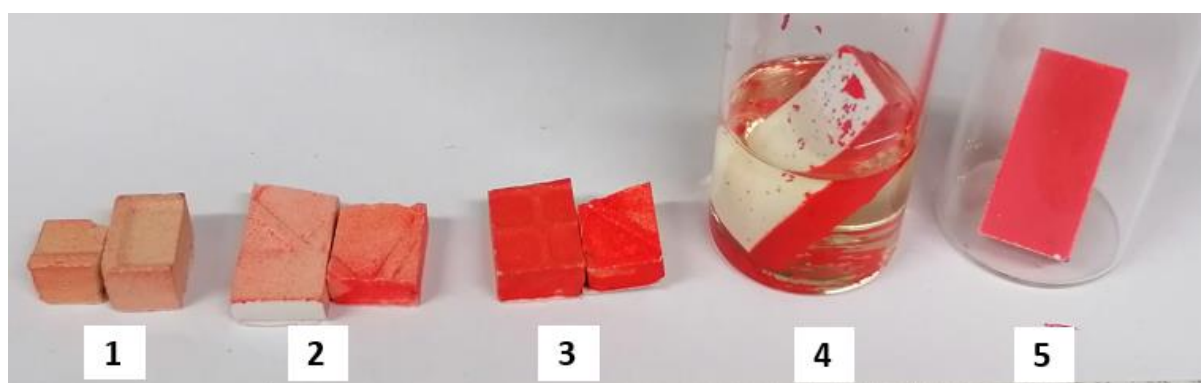

**Figure S4.** Scores from 1 (good cleaning) to 5 (no change) given to the cleaned tiles.

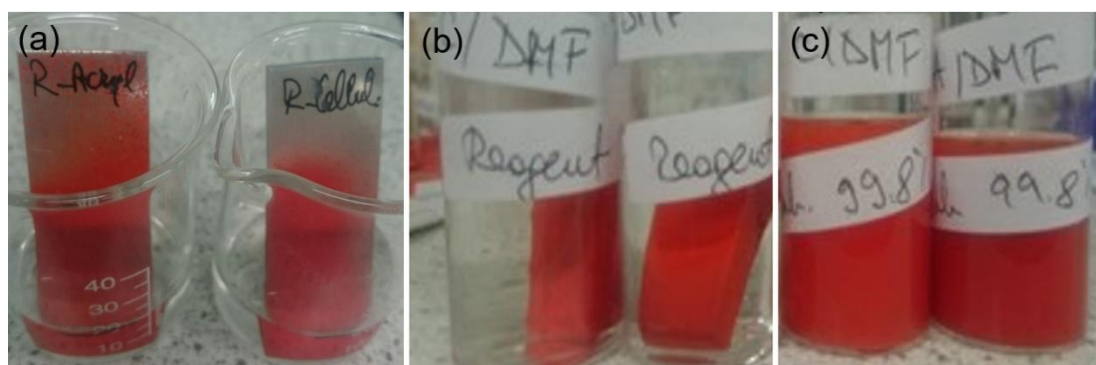

**Figure S5.** DMF technical grade (a, b) and anhydrous (c) used as paint stripper of acrylic and cellulose-based paints from aluminium foil (a) and ceramic tiles (b, c).

**Table S1.** Water content determination *via* volumetric Karl Fisher titration.

| Sample name        | Sample no. | Measured water content (%) | Average water content (%) | Standard deviation (%) |
|--------------------|------------|----------------------------|---------------------------|------------------------|
| Cyrene 98.5%       | 1          | 0.12                       | 0.13                      | 0.01                   |
|                    | 2          | 0.14                       |                           |                        |
|                    | 3          | 0.13                       |                           |                        |
| NMP 99.5%          | 1          | 0.18                       | 0.19                      | 0.01                   |
|                    | 2          | 0.19                       |                           |                        |
|                    | 3          | 0.2                        |                           |                        |
| DMF min. 98%       | 1          | 1.95                       | 1.97                      | 0.03                   |
|                    | 2          | 1.96                       |                           |                        |
|                    | 3          | 2                          |                           |                        |
| DMF $\geq 99.8\%$  | 1          | 0.17                       | 0.12                      | 0.05                   |
|                    | 2          | 0.09                       |                           |                        |
|                    | 3          | 0.09                       |                           |                        |
| DCM $\geq 99\%$    | 1          | 0                          | <0.01                     | 0                      |
|                    | 2          | 0                          |                           |                        |
|                    | 3          | 0                          |                           |                        |
| DMAc $\geq 99.5\%$ | 1          | 0.22                       | 0.18                      | 0.04                   |
|                    | 2          | 0.16                       |                           |                        |
|                    | 3          | 0.15                       |                           |                        |
| DMSO $\geq 99\%$   | 1          | 0.03                       | 0.03                      | 0.02                   |
|                    | 2          | 0.04                       |                           |                        |
|                    | 3          | 0.01                       |                           |                        |

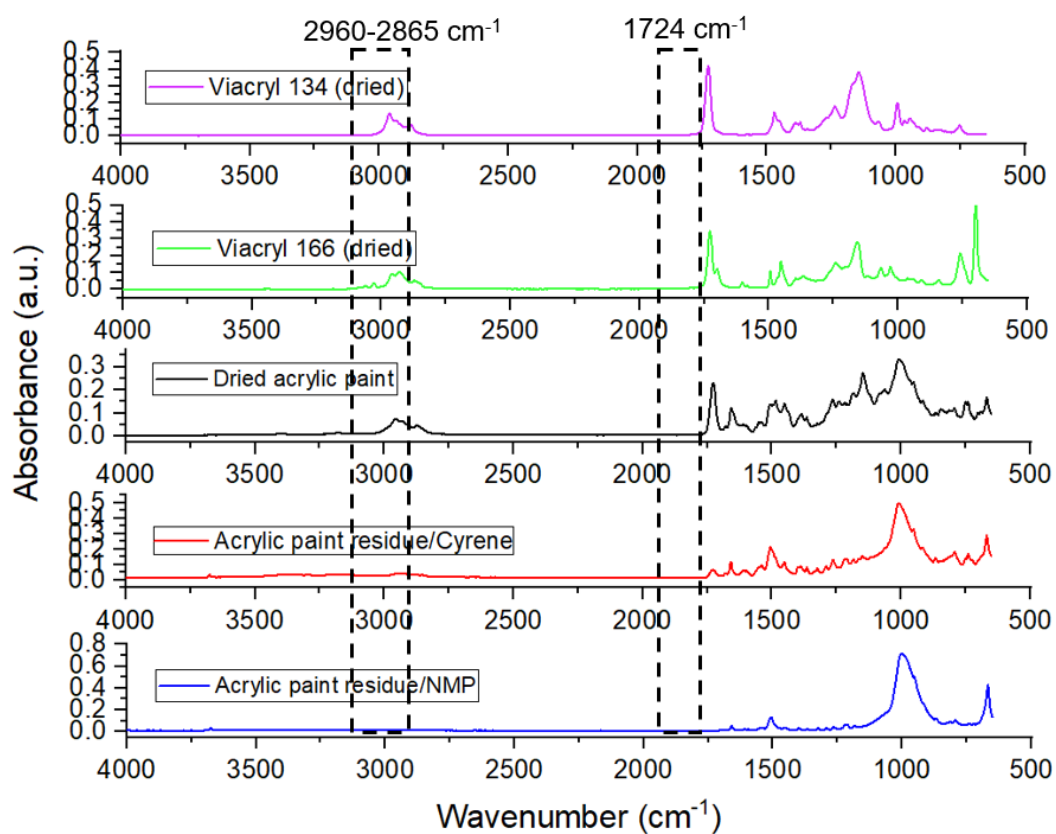

**Figure S6.** The infrared spectra for the dry acrylic red paint (black line) and residues after removal with Cyrene (red line) and NMP (blue line). Two acrylic resins (green and purple lines) are shown here for comparison.

**Table S2.** The inorganic content of the acrylic paint residues remaining after dissolution in Cyrene and NMP.

| Element | Dried acrylic paint (%) | Solid residue resulted from cleaning using Cyrene | Solid residue resulted from cleaning using NMP |
|---------|-------------------------|---------------------------------------------------|------------------------------------------------|
| Mg      | 1                       | 2.3                                               | 3.5                                            |
| Ca      | 0.3                     | 0.14                                              | 0.59                                           |
| Al      | 0.2                     | 0.5                                               | 0.9                                            |
| P       | 0.14                    | 0.07                                              | 0.11                                           |
| Fe      | 0.08                    | 0.2                                               | 0.3                                            |
| Ba      | 0.05                    | 0.1                                               | 0.2                                            |
| Na      | 0.04                    | 0.0026                                            | 0.0024                                         |
| K       | 0.023                   | 0.027                                             | 0.05                                           |
| Zn      | 0.003                   | 0.006                                             | 0.02                                           |
| Mn      | 0.003                   | 0.004                                             | 0.01                                           |
| Cr      | 0.0003                  | 0.0007                                            | 0.001                                          |
| Pb      | 0.0003                  | 0.0001                                            | 0.0006                                         |
| Ni      | 0.0003                  | 0.0007                                            | 0.0008                                         |
| Sn      | 0.00017                 | 0.0023                                            | 0.0004                                         |
| Cu      | 0.0001                  | 0.001                                             | 0.004                                          |
| Se      | 0.00005                 | <0.0000005                                        | 0.00008                                        |
| Cd      | 0.000035                | 0.000026                                          | 0.00005                                        |
| Co      | 0.00003                 | 0.00007                                           | 0.0001                                         |
| As      | 0.000027                | 0.000034                                          | 0.0001                                         |

< represents a lower than the limit of quantification (LOQ), which is three times the limit of detection (LOD). Numbers in red represent a lower concentration than of the element from the original paint, suggesting the solubility of those elements in solvent. Number in blue and black represent higher concentrations than the elements from the original paint, indicating a chemical change.

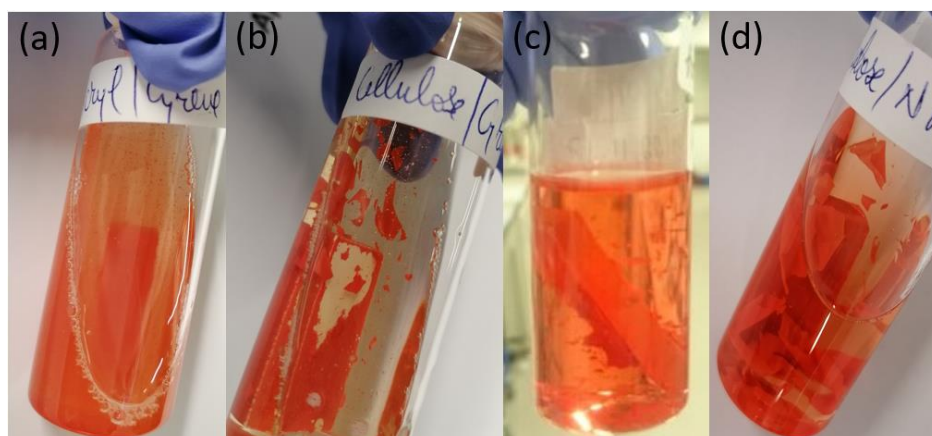

**Figure S7.** The removal process of acrylic (a, c) and cellulose-based (b, d) paint using Cyrene (a, b) and NMP (c, d) from a tile.

**Table S3.** Dynamic and apparent viscosities of Cyrene and Cyrene-water mixtures using different methods and the final temperatures after mixing Cyrene and water at different ratios.

| Sample              | Final temperature (°C)<br>after mixing Cyrene<br>with water (200 mL<br>total volume) | Dynamic viscosity at<br>20 °C (cP) | Apparent (shear)<br>viscosity at 20 °C<br>(cP) |
|---------------------|--------------------------------------------------------------------------------------|------------------------------------|------------------------------------------------|
| Cyrene              | 20                                                                                   | 46                                 | 11.67                                          |
| 75% Cyrene in water | 34                                                                                   | 79                                 | 28.64                                          |
| 50% Cyrene in water | 38                                                                                   | 45.8                               | 11.89                                          |
| 25% Cyrene in water | 32                                                                                   | 16.8                               | 3.67                                           |

Only the dynamic viscosity was measured for NMP (12 cP).

**Table S4.** Hansen Solubility Parameters, the scores given and relative energy distance (RED) of the neat solvents for acrylic paint removal.

| Solvent                              | $\delta_D$ | $\delta_P$ | $\delta_H$ | Score | RED   |
|--------------------------------------|------------|------------|------------|-------|-------|
| <i>N</i> -Methyl-2-Pyrrolidone (NMP) | 18         | 12.3       | 7.2        | 2**   | 0.726 |
| <i>N,N'</i> -Dimethylformamide (DMF) | 17.4       | 13.7       | 11.3       | 2***  | 0.784 |
| <i>N,N'</i> -Dimethylacetamide       | 16.8       | 11.5       | 9.4        | 2     | 0.993 |
| Cyrene                               | 18.9       | 12.4       | 7.1        | 1     | 0.96  |
| Dimethyl Sulfoxide (DMSO)            | 18.4       | 16.4       | 10.2       | 2     | 0.96  |
| Acetone                              | 15.5       | 10.4       | 7          | 3     | 1.935 |
| Methylene Chloride (DCM)             | 17         | 7.3        | 7.1        | 3     | 2.177 |
| Dimethyl Carbonate                   | 15.5       | 8.6        | 9.7        | 3     | 2.213 |
| Acetonitrile                         | 15.3       | 18         | 6.1        | 3     | 2.286 |
| Propylene Carbonate                  | 20         | 18         | 4.1        | 3     | 2.413 |
| Tetrahydrofuran (THF)                | 16.8       | 5.7        | 8          | 3     | 2.628 |
| OME <sub>e(3-5)</sub>                | 15.6       | 7.1        | 6.1        | 3     | 2.669 |
| Benzyl Alcohol                       | 18.4       | 6.3        | 13.7       | 4     | 2.747 |
| 1,1-Dichloroethane                   | 16.5       | 7.8        | 3          | 4     | 2.764 |
| Ethyl Acetate                        | 15.8       | 5.3        | 7.2        | 3     | 2.982 |
| Acetic Acid                          | 14.5       | 8          | 13.5       | 4     | 3.114 |
| 2-Methylfuran                        | 17.3       | 2.8        | 7.4        | 4     | 3.451 |
| Propionic Acid                       | 14.7       | 5.3        | 12.4       | 3     | 3.467 |
| 1-Butanol                            | 16         | 5.7        | 15.8       | 3     | 3.488 |
| 2-Propanol                           | 15.8       | 6.1        | 16.4       | 3     | 3.566 |
| 1-Propanol                           | 16         | 6.8        | 17.4       | 4     | 3.6   |
| Chlorobenzene                        | 19         | 4.3        | 2          | 3     | 3.71  |
| Ethanol                              | 15.8       | 8.8        | 19.4       | 3     | 3.829 |
| 2-Pinene (dl)                        | 16.9       | 1.8        | 3.1        | 5     | 4.186 |
| Diethyl Ether                        | 14.5       | 2.9        | 4.6        | 4     | 4.214 |
| 2,2,5,5,-Tetramethyloxolane (TMO)    | 15.6       | 2.3        | 2.4        | 4     | 4.352 |
| Toluene                              | 18         | 1.4        | 2          | 3     | 4.409 |
| Cyclohexene                          | 17.2       | 1          | 2          | 4     | 4.54  |
| Methanol                             | 14.7       | 12.3       | 22.3       | 5     | 4.643 |
| $\beta$ -Pinene                      | 16.2       | 1          | 1.8        | 4     | 4.674 |

|                  |      |     |      |   |        |
|------------------|------|-----|------|---|--------|
| Heptane          | 15.3 | 0   | 0    | 5 | 5.365  |
| Hexane           | 14.9 | 0   | 0    | 5 | 5.447  |
| Lactic Acid (dl) | 17   | 8.3 | 28.4 | 5 | 6.323  |
| Water            | 15.5 | 16  | 42.3 | 5 | 10.537 |

\* Wrongly positioned solvents inside or outside the Hansen space. The solvent with scores "1" and "2" are/should be inside the Hansen sphere. The solvents with scores "3-5" are considered bad solvents are are/should be positioned outside the Hansen sphere. Hansen solubility parameters of the solvents are sourced from HSPiP database and expressed in MPa<sup>1/2</sup>. \*\*NMP received score "2" because despite being covered in a yellow layer, it can be easily removed. \*\*\*DMF anhydrous 99.8%.

**Table S5.** Hansen Solubility Parameters, the scores given and relative energy distance (RED) of the neat solvents for cellulose-based paint removal.

| Solvent                               | $\delta_D$ | $\delta_P$ | $\delta_H$ | Score | RED    |
|---------------------------------------|------------|------------|------------|-------|--------|
| Dimethyl Sulfoxide (DMSO)             | 18.4       | 16.4       | 10.2       | 1     | 0.312  |
| <i>N,N'</i> -Dimethylformamide (DMF)  | 17.4       | 13.7       | 11.3       | 1**   | 0.394  |
| <i>N,N'</i> -Dimethylacetamide (DMAc) | 16.8       | 11.5       | 9.4        | 1     | 0.712  |
| Cyrene                                | 18.9       | 12.4       | 7.1        | 1     | 0.734  |
| <i>N</i> -Methyl-2-Pyrrolidone (NMP)  | 18         | 12.3       | 7.2        | 1     | 0.737  |
| Propylene Carbonate                   | 20         | 18         | 4.1        | 2     | 1.002* |
| Benzyl Alcohol                        | 18.4       | 6.3        | 13.7       | 4     | 1.006  |
| Acetonitrile                          | 15.3       | 18         | 6.1        | 3     | 1.016  |
| Dimethyl carbonate                    | 15.5       | 8.6        | 9.7        | 3     | 1.053  |
| Acetone                               | 15.5       | 10.4       | 7          | 3     | 1.072  |
| Ethanol                               | 15.8       | 8.8        | 19.4       | 3     | 1.139  |
| Methylene Chloride (DCM)              | 17         | 7.3        | 7.1        | 5     | 1.145  |
| 1-Propanol                            | 16         | 6.8        | 17.4       | 5     | 1.175  |
| Acetic Acid                           | 14.5       | 8          | 13.5       | 2     | 1.182* |
| 2-Propanol                            | 15.8       | 6.1        | 16.4       | 5     | 1.220  |
| 1-Butanol                             | 16         | 5.7        | 15.8       | 5     | 1.222  |
| Tetrahydrofuran (THF)                 | 16.8       | 5.7        | 8          | 3     | 1.248  |
| Methanol                              | 14.7       | 12.3       | 22.3       | 5     | 1.294  |
| OME <sub>(3-5)</sub>                  | 15.6       | 7.1        | 6.1        | 4     | 1.327  |
| Propionic Acid                        | 14.7       | 5.3        | 12.4       | 5     | 1.369  |
| 1,1-Dichloroethane                    | 16.5       | 7.8        | 3          | 5     | 1.417  |
| 2-Methylfuran                         | 17.3       | 2.8        | 7.4        | 5     | 1.513  |
| Chlorobenzene                         | 19         | 4.3        | 2          | 5     | 1.674  |
| Lactic Acid (dl)                      | 17         | 8.3        | 28.4       | 5     | 1.790  |
| Diethyl Ether                         | 14.5       | 2.9        | 4.6        | 5     | 1.824  |
| $\beta$ -Pinene                       | 16.9       | 1.8        | 3.1        | 5     | 1.832  |
| 2,2,5,5-Tetramethyloxolane (TMO)      | 15.6       | 2.3        | 2.4        | 5     | 1.903  |
| Toluene                               | 18         | 1.4        | 2          | 5     | 1.903  |
| Cyclohexene                           | 17.2       | 1          | 2          | 5     | 1.953  |
| Heptane                               | 15.3       | 0          | 0          | 5     | 2.245  |
| Hexane                                | 14.9       | 0          | 0          | 5     | 2.271  |
| Water                                 | 15.5       | 16         | 42.3       | 5     | 3.068  |



\* Wrongly positioned solvents inside or outside the Hansen space. Hansen solubility parameters of the solvents are sourced from HSPiP database and expressed in MPa<sup>1/2</sup>. \*\*DMF anhydrous 99.8%.

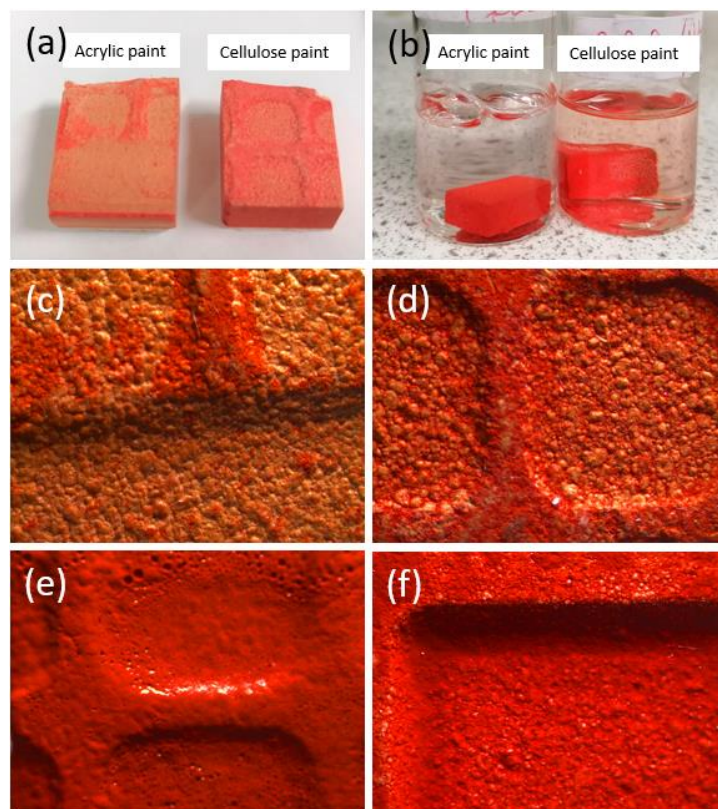

**Figure S8.** The use of binary solvent systems 75% Cyrene-25% water (a) and 75% NMP-25% water (b) as paint strippers for the acrylic (c, e) and cellulose paints (d, f).

**Table S6.** Hansen Solubility Parameters, the scores given and relative energy distance (RED) of the neat solvents and mixtures of Cyrene with greener solvents for acrylic paint removal.

| Solvent                              | $\delta_D$ | $\delta_P$ | $\delta_H$ | Score | RED   |
|--------------------------------------|------------|------------|------------|-------|-------|
| <i>N</i> -Methyl-2-Pyrrolidone (NMP) | 18         | 12.3       | 7.2        | 2**   | 0.742 |
| <i>N,N'</i> -Dimethylformamide (DMF) | 17.4       | 13.7       | 11.3       | 2***  | 0.767 |
| 50% Cyrene-50% GVL                   | 17.9       | 11.9       | 6.9        | -     | 0.889 |
| 75% Cyrene-25% GVL                   | 18.4       | 12.1       | 7          | -     | 0.892 |
| Dimethyl Sulfoxide (DMSO)            | 18.4       | 16.4       | 10.2       | 2     | 0.957 |
| <i>N,N'</i> -Dimethylacetamide       | 16.8       | 11.5       | 9.4        | 2     | 0.98  |
| Cyrene                               | 18.9       | 12.4       | 7.1        | 1     | 0.989 |
| 25% Cyrene-75% GVL                   | 17.3       | 11.6       | 6.8        | -     | 1.035 |
| $\gamma$ -Valerolactone (GVL)        | 16.8       | 11.4       | 6.7        | -     | 1.233 |
| 75% Cyrene-25% MeTHF                 | 18.4       | 10.6       | 6.4        | -     | 1.336 |



|                                  |       |      |      |   |        |
|----------------------------------|-------|------|------|---|--------|
| 50% Cyrene- 50% MeTHF            | 17.9  | 8.7  | 5.7  | - | 1.901  |
| Acetone                          | 15.5  | 10.4 | 7    | 3 | 1.92   |
| 75% Cyrene-25% Water             | 18.1  | 13.3 | 15.9 | 2 | 2.16   |
| Methylene Chloride               | 17    | 7.3  | 7.1  | 3 | 2.183  |
| Acetonitrile                     | 15.3  | 18   | 6.1  | 3 | 2.26   |
| Propylene Carbonate              | 20    | 18   | 4.1  | 3 | 2.428  |
| 25% Cyrene- 75% MeTHF            | 17.4  | 6.9  | 5    | - | 2.51   |
| Tetrahydrofuran (THF)            | 16.8  | 5.7  | 8    | 3 | 2.633  |
| OME <sub>(3-5)</sub>             | 15.6  | 7.1  | 6.1  | 3 | 2.682  |
| Benzyl Alcohol                   | 18.4  | 6.3  | 13.7 | 4 | 2.782  |
| 1,1-Dichloroethane               | 16.5  | 7.8  | 3    | 4 | 2.787  |
| Ethyl Acetate                    | 15.8  | 5.3  | 7.2  | 3 | 3.003  |
| Acetic Acid                      | 14.5  | 8    | 13.5 | 4 | 3.103  |
| 2-Methyl Tetrahydrofuran (MeTHF) | 16.9  | 5    | 4.3  | - | 3.176  |
| Propionic Acid                   | 14.7  | 5.3  | 12.4 | 3 | 3.47   |
| 2-Methylfuran                    | 17.3  | 2.8  | 7.4  | 4 | 3.49   |
| 1-Butanol                        | 16    | 5.7  | 15.8 | 3 | 3.496  |
| 2-Propanol                       | 15.8  | 6.1  | 16.4 | 3 | 3.57   |
| 1-Propanol                       | 16    | 6.8  | 17.4 | 4 | 3.602  |
| Chlorobenzene                    | 19    | 4.3  | 2    | 3 | 3.759  |
| Ethanol                          | 15.8  | 8.8  | 19.4 | 3 | 3.821  |
| 2-Pinene (dl)                    | 16.9  | 1.8  | 3.1  | 5 | 4.222  |
| Diethyl Ether                    | 14.5  | 2.9  | 4.6  | 4 | 4.23   |
| 2,2,5,5-Tetramethyloxolane (TMO) | 15.6  | 2.3  | 2.4  | 4 | 4.378  |
| Toluene                          | 18    | 1.4  | 2    | 3 | 4.453  |
| Cyclohexene                      | 17.2  | 1    | 2    | 4 | 4.579  |
| Methanol                         | 14.7  | 12.3 | 22.3 | 5 | 4.617  |
| $\beta$ -Pinene                  | 16.2  | 1    | 1.8  | 4 | 4.706  |
| 50% Cyrene-50% Water             | 17.2  | 14.2 | 24.7 | - | 4.918  |
| Heptane                          | 15.3  | 0    | 0    | 5 | 5.392  |
| Hexane                           | 14.9  | 0    | 0    | 5 | 5.472  |
| Lactic Acid (dl)                 | 17    | 8.3  | 28.4 | 5 | 6.317  |
| 25% Cyrene-75% Water             | 16.35 | 15.1 | 33.5 | - | 7.718  |
| Water                            | 15.5  | 16   | 42.3 | 5 | 10.525 |

\* Wrongly positioned solvents inside or outside the Hansen space. – refers to the solvents only predicted and not tested in paint solubility. Hansen solubility parameters of the solvents are sourced from HSPiP database and expressed in MPa<sup>1/2</sup>. \*\*NMP received score “2” because despite being covered in a yellow layer, it can be easily removed. \*\*\*DMF anhydrous 99.8%.

**Table S7.** Hansen Solubility Parameters, the scores given and relative energy distance (RED) of the neat solvents and mixtures of Cyrene with greener solvents for cellulose-based paint removal.

| Solvent                               | $\delta_D$ | $\delta_P$ | $\delta_H$ | Score | RED    |
|---------------------------------------|------------|------------|------------|-------|--------|
| Dimethyl Sulfoxide (DMSO)             | 18.4       | 16.4       | 10.2       | 1     | 0.311  |
| <i>N,N'</i> -Dimethylformamide (DMF)  | 17.4       | 13.7       | 11.3       | 1**   | 0.393  |
| 75% Cyrene- 25% Water                 | 18.1       | 13.3       | 15.9       | 3     | 0.411  |
| <i>N,N'</i> -Dimethylacetamide (DMAc) | 16.8       | 11.5       | 9.4        | 1     | 0.71   |
| Cyrene                                | 18.9       | 12.4       | 7.1        | 1     | 0.733  |
| <i>N</i> -Methyl-2-Pyrrolidone (NMP)  | 18         | 12.3       | 7.2        | 1     | 0.736  |
| 75% Cyrene- 25% GVL                   | 18.4       | 12.1       | 7          | -     | 0.756  |
| 50% Cyrene- 50% GVL                   | 17.9       | 11.9       | 6.9        | -     | 0.787  |
| 25% Cyrene- 75% GVL                   | 17.3       | 11.6       | 6.8        | -     | 0.843  |
| $\gamma$ -Valerolactone               | 16.8       | 11.35      | 6.7        | -     | 0.902  |
| Propylene Carbonate                   | 20         | 18         | 4.1        | 2     | 1.001* |
| Benzyl Alcohol                        | 18.4       | 6.3        | 13.7       | 4     | 1.006  |
| Acetonitrile                          | 15.3       | 18         | 6.1        | 3     | 1.014  |
| Acetone                               | 15.5       | 10.4       | 7          | 3     | 1.07   |
| 50% Cyrene- 50% MeTHF                 | 17.9       | 8.7        | 5.7        | -     | 1.089  |
| Ethanol                               | 15.8       | 8.8        | 19.4       | 3     | 1.139  |
| Methylene Chloride                    | 17         | 7.3        | 7.1        | 5     | 1.144  |
| 1-Propanol                            | 16         | 6.8        | 17.4       | 5     | 1.174  |
| Acetic Acid                           | 14.5       | 8          | 13.5       | 2     | 1.181* |
| 2-Propanol                            | 15.8       | 6.1        | 16.4       | 5     | 1.22   |
| 1-Butanol                             | 16         | 5.7        | 15.8       | 5     | 1.221  |
| 50% Cyrene- 50% Water                 | 17.2       | 14.2       | 24.7       | -     | 1.236  |
| Tetrahydrofuran (THF)                 | 16.8       | 5.7        | 8          | 3     | 1.247  |
| 25% Cyrene- 75% MeTHF                 | 17.4       | 6.9        | 5          | -     | 1.287  |
| Methanol                              | 14.7       | 12.3       | 22.3       | 5     | 1.293  |
| OME <sub>(3-5)</sub>                  | 15.6       | 7.1        | 6.1        | 4     | 1.326  |
| Propionic Acid                        | 14.7       | 5.3        | 12.4       | 5     | 1.368  |
| Ethyl Acetate                         | 15.8       | 5.3        | 7.2        | -     | 1.39   |
| 1,1-Dichloroethane                    | 16.5       | 7.8        | 3          | 5     | 1.416  |
| 75% Cyrene- 25% MeTHF                 | 18.4       | 10.6       | -          | -     | 1.47   |
| 2-Methyl Tetrahydrofuran (2-MeTHF)    | 16.9       | 5          | 4.3        | -     | 1.5    |
| 2-Methylfuran                         | 17.3       | 2.8        | 7.4        | 5     | 1.512  |
| Chlorobenzene                         | 19         | 4.3        | 2          | 5     | 1.673  |
| Lactic Acid (dl)                      | 17         | 8.3        | 28.4       | 5     | 1.791  |
| Diethyl Ether                         | 14.5       | 2.9        | 4.6        | 5     | 1.823  |
| 2-Pinene (dl)                         | 16.9       | 1.8        | 3.1        | 5     | 1.831  |
| 2,2,5,5-Tetramethyloxolane (TMO)      | 15.6       | 2.3        | 2.4        | 5     | 1.902  |
| Toluene                               | 18         | 1.4        | 2          | 5     | 1.902  |
| Cycloheptane                          | 17.1       | 1.4        | 1.9        | -     | 1.929  |
| Cyclohexene                           | 17.2       | 1          | 2          | 5     | 1.952  |
| $\beta$ -Pinene                       | 16.2       | 1          | 1.8        | 5     | 2.005  |
| 25% Cyrene- 75% Water                 | 16.4       | 15.1       | 33.5       | -     | 2.145  |

|         |      |    |      |   |       |
|---------|------|----|------|---|-------|
| Heptane | 15.3 | 0  | 0    | 5 | 2.244 |
| Hexane  | 14.9 | 0  | 0    | 5 | 2.27  |
| Water   | 15.5 | 16 | 42.3 | 5 | 3.069 |

\* *Wrongly positioned solvents inside or outside the Hansen space. – refers to the solvents only predicted and not tested in paint solubility. Hansen solubility parameters of the solvents are sourced from HSPiP database and expressed in MPa<sup>1/2</sup>. \*\*DMF anhydrous 99.8%.*
